# Supplementary material
Source: PubMed Central journal article supplement (PMC9535502)
Supplement: jamadermatol-e223917-s002.pdf [file jamadermatol-e223917-s002.pdf]

## Supplemental Online Content

Bitar C, Ninh T, Brag K, et al. Apremilast in recalcitrant cutaneous dermatomyositis. *JAMA Dermatol*. Published online October 5, 2022. doi:10.1001/jamadermatol.2022.3917

**eTable 1.** Immunohistochemical Staining Technique

**eTable 2.** Adverse Events After Apremilast

**eFigure 1.** Flow Chart

**eFigure 2.** Absolute Change in Cutaneous Disease Activity Severity Index Score by Patient at 3 mo Into Apremilast Therapy

**eFigure 3.** Chemokine (C-C Motif) Ligand 5 (CCL5) Level Before and 3 mo After

This supplemental material has been provided by the authors to give readers additional information about their work.

| Antibody          | Vendor                                     | Antigen Retrieval                     | Dilution | Time (Room Temperature) |
|-------------------|--------------------------------------------|---------------------------------------|----------|-------------------------|
| CCL5/RANTES       | Invitrogen/Fisher,<br>Cat# 710001          | Dako Envision<br>Flex TRS, Low<br>pH  | 1:1600   | 60 mins                 |
| phospho-<br>STAT1 | Cell Signaling<br>Technology,<br>Cat# 9167 | Dako Envision<br>Flex TRS, High<br>pH | 1:75     | 60 mins                 |
| phospho-<br>STAT3 | Cell Signaling<br>Technology,<br>Cat# 9145 | Dako Envision<br>Flex TRS, High<br>pH | 1:100    | 60 mins                 |

**eTable 1.** Immunohistochemical Staining Technique

| Adverse Event   | Grade 1-2 | Grade 3-5 |
|-----------------|-----------|-----------|
| Headache        | 7 (87.5%) | 0         |
| Nausea          | 5 (62.5%) | 0         |
| Diarrhea        | 4 (50%)   | 0         |
| Herpes Zoster   | 2 (25%)   | 0         |
| Influenza       | 1 (12.5%) | 0         |
| Pneumonia       | 1 (12.5%) | 0         |
| Acute sinusitis | 1 (12.5%) | 0         |
| Hypertension    | 1 (12.5%) | 0         |
| Ocular Pressure | 1 (12.5%) | 0         |

**eTable 2.** Adverse Events After Apremilast  
CTCAE version 5.0.

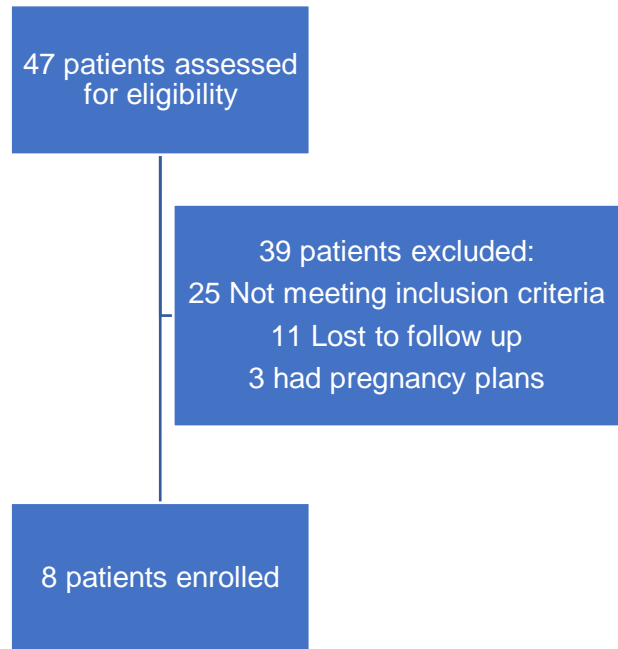

**eFigure 1.** Flow Chart

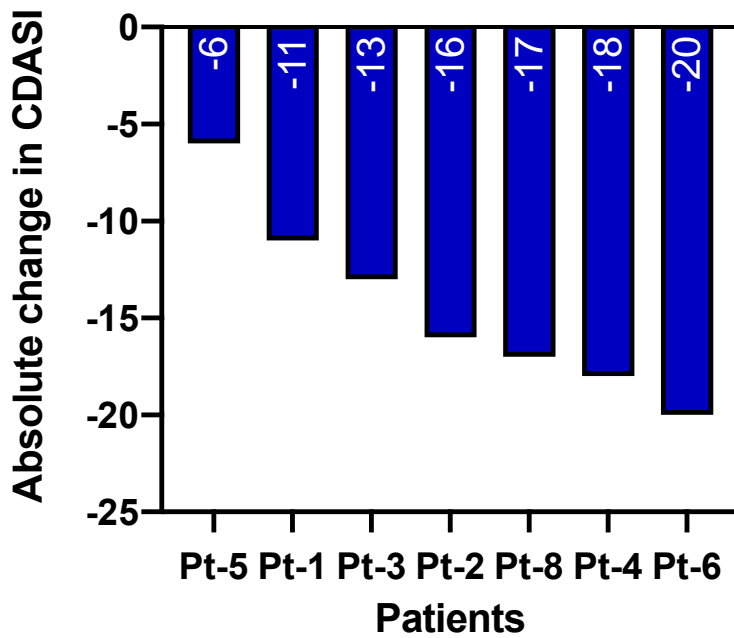

**eFigure 2.** Absolute Change in Cutaneous Disease Activity Severity Index Score by Patient at 3 mo Into Apremilast Therapy

A

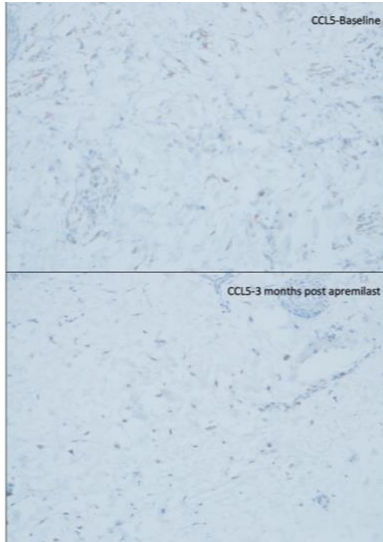

B

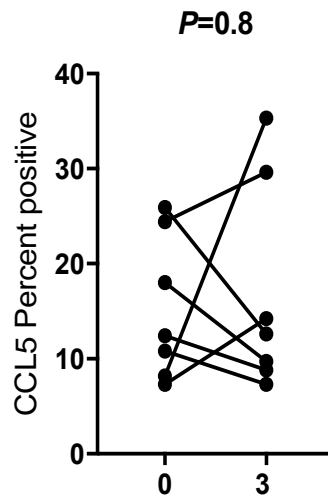

C

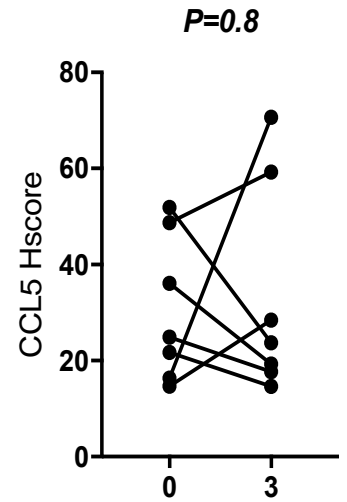

**eFigure 3.** Chemokine (C-C Motif) Ligand 5 (CCL5) Level Before and 3 mo After Apremilast

**A.** No significant change in CCL5 immunostain on frozen section of patient 2 skin biopsies before and 3 months post apremilast. (original magnification x200). **B-C.** Paired analysis change in CCL5 percent positive cells and H score at baseline and 3 months post apremilast.
