# Supplementary material
Source: PubMed Central journal article supplement (PMC9535502)
Supplement: jamadermatol-e223917-s003.pdf [file jamadermatol-e223917-s003.pdf]

## Data Sharing Statement

Bitar C, Ninh T, Brag K, et al. Apremilast in recalcitrant cutaneous dermatomyositis. *JAMA Dermatol*. Published online October 5, 2022. doi:10.1001/jamadermatol.2022.3917

### Data

**Data available:** Yes

**Data types:** Deidentified participant data

**How to access data:** data can be requested from primary investigator Carole Bitar, email: [cbitar@tulane.edu](mailto:cbitar@tulane.edu)

**When available:** With publication

## Supporting Documents

**Document types:** None

## Additional Information

**Who can access the data:** Researchers whose proposed use of the data has been approved

**Types of analyses:** For any research purpose

**Mechanisms of data availability:** With investigator support
